# Supplementary material for: Mechanism Underlying Bacillus subtilis BS-Z15 Metabolite-Induced Prevention of Grain Contamination by Aspergillus flavus
Source: MDPI journal article supplement (doi:10.3390/toxins15120667), 2023-11-22
Supplement: s1 [file s1]

# Supplementary Materials: Mechanism Underlying *Bacillus subtilis* BS-Z15 Metabolite-Induced Prevention of Grain Contamination by *Aspergillus flavus*

Jingjing Zhao, Jun Yang, Haoran Li, Huanchen Ning, Jiayi Chen, Zhihui Chen, Heping Zhao and Huixin Zhao

Table S1. Statistics of sequencing data.

| Samples | Clean reads | Clean bases   | GC Content | %≥Q30  |
|---------|-------------|---------------|------------|--------|
| CK1     | 22,386,295  | 6,696,520,678 | 52.06%     | 94.39% |
| CK2     | 21,582,670  | 6,456,964,878 | 52.08%     | 94.21% |
| CK3     | 20,967,620  | 6,278,301,228 | 51.37%     | 94.19% |
| H201    | 20,606,012  | 6,171,415,484 | 52.45%     | 93.71% |
| H202    | 21,298,436  | 6,375,798,960 | 52.65%     | 93.79% |
| H203    | 22,341,048  | 6,689,538,538 | 52.56%     | 94.67% |
| H31     | 20,345,623  | 6,091,658,234 | 52.51%     | 94.48% |
| H32     | 20,661,009  | 6,187,646,738 | 52.60%     | 94.12% |
| H33     | 21,387,432  | 6,397,095,262 | 52.79%     | 94.18% |
| L201    | 21,148,316  | 6,332,071,044 | 52.59%     | 94.46% |
| L202    | 21,727,698  | 6,504,578,288 | 52.59%     | 94.30% |
| L203    | 20,762,266  | 6,217,574,048 | 52.29%     | 93.96% |
| L31     | 20,600,728  | 6,167,592,962 | 52.70%     | 94.14% |
| L32     | 21,167,586  | 6,334,672,286 | 52.72%     | 94.38% |
| L33     | 21,034,646  | 6,297,696,836 | 52.61%     | 94.21% |

Note: H201-H203 is 20μg/mL 12h; H31-H33 is 20μg/mL 3h; L201-L203 is 4μg/mL 12h; L31-L33 is 4μg/mL 3h

Table S2. Specific primer sequences used in qRT-PCR.

| Primer name | Primer sequences(5'-3')                                |
|-------------|--------------------------------------------------------|
| 18S         | F: GCTCTTTTGGGTCTCGTAATTGG<br>R:CGCTATTGGAGCTGGAATTACC |
| aflR        | F: CCTTTCTCACTACTCGGGTTT<br>R:GCAGGTAATCAATAATGTCCG    |
| aflT        | F:GATTCTATTGCCTTGATTTTGG<br>R:GGCGTAGTGCCCTGTCTTAT     |
| aflP(omtA)  | F:CACGCTTTCAGAGCAGGTAA<br>R:TTCGGTGGAGGAGGGAGTT        |

Table S3. Fluorescence quantitative PCR reaction system.

| Composition                   | 50μL System |
|-------------------------------|-------------|
| 2xSuperReal PreMix Plus       | 25μL        |
| 50×ROX Reference Dye          | 1.0μL       |
| Forward primers               | 1.5μL       |
| Reverse Primers               | 1.5μL       |
| RNA template                  | 5μL         |
| RNase-Free ddH <sub>2</sub> O | Add to 50μL |

Table S4. Real-time PCR reaction program.

| Circulation | Stage          | Temperature | Time  | Contents            |
|-------------|----------------|-------------|-------|---------------------|
| 1×          | Pre-mutability | 95°C        | 15min | Pre-mutability      |
| 40×         | PCR reactions  | 95°C        | 10sec | Gender reassignment |
|             |                | 50-60°C     | 20sec | Annealing           |
|             |                | 72°C        | 30sec | Extension           |

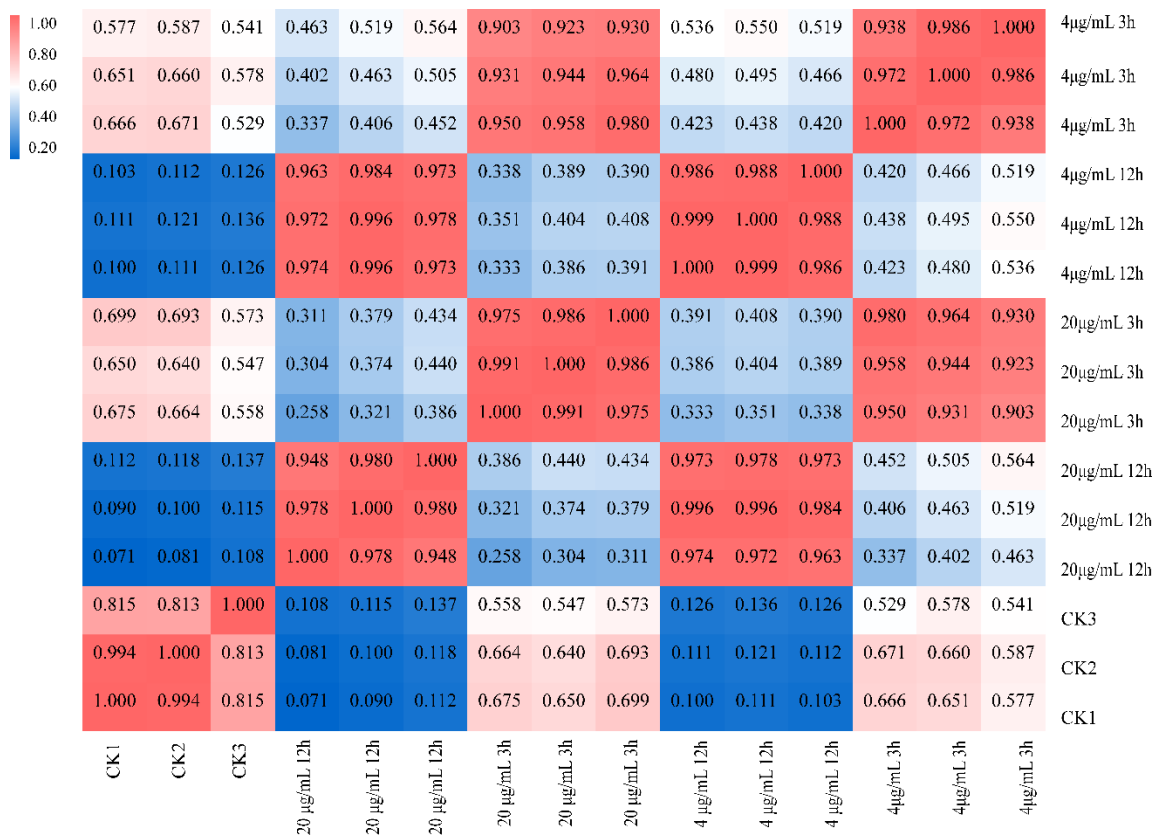

Figure S1. Correlation heat map between the control group and Myco treatment group.
